# Supplementary material for: Synthesis of polyurethane particles in supercritical carbon dioxide using organocatalysts or organocatalytic surfactants
Source: Royal Society of Chemistry journal article supplement (doi:10.1039/c3gc41217b), 2013-01-01
Supplement: c3gc41217b.pdf [file c3gc41217b.pdf]

## Supplementary Information for

### Synthesis of polyurethane particles in supercritical carbon dioxide using organocatalysts or organocatalytic surfactants

Christopher A. Smith,<sup>a,b</sup> Eric Cloutet,<sup>a</sup> Thierry Tassaing<sup>b</sup> and Henri Cramail\*<sup>a</sup>

<sup>a</sup> Univ. Bordeaux, LCPO, UMR 5629, F-33600 Pessac, France.

CNRS, LCPO, UMR 5629, F-33607 Pessac Cedex, France.

Fax: +33540008487; Tel: +33540006254; E-mail: [cramail@enscbp.fr](mailto:cramail@enscbp.fr)

<sup>b</sup> Univ. Bordeaux, ISM, UMR 5255, F-33400 Talence, France.

CNRS, ISM, UMR 5255, F-33405 Talence Cedex, France.

Fax: +33540008402; Tel: +33540002892; E-mail: [t.tassaing@ism.u-bordeaux1.fr](mailto:t.tassaing@ism.u-bordeaux1.fr)

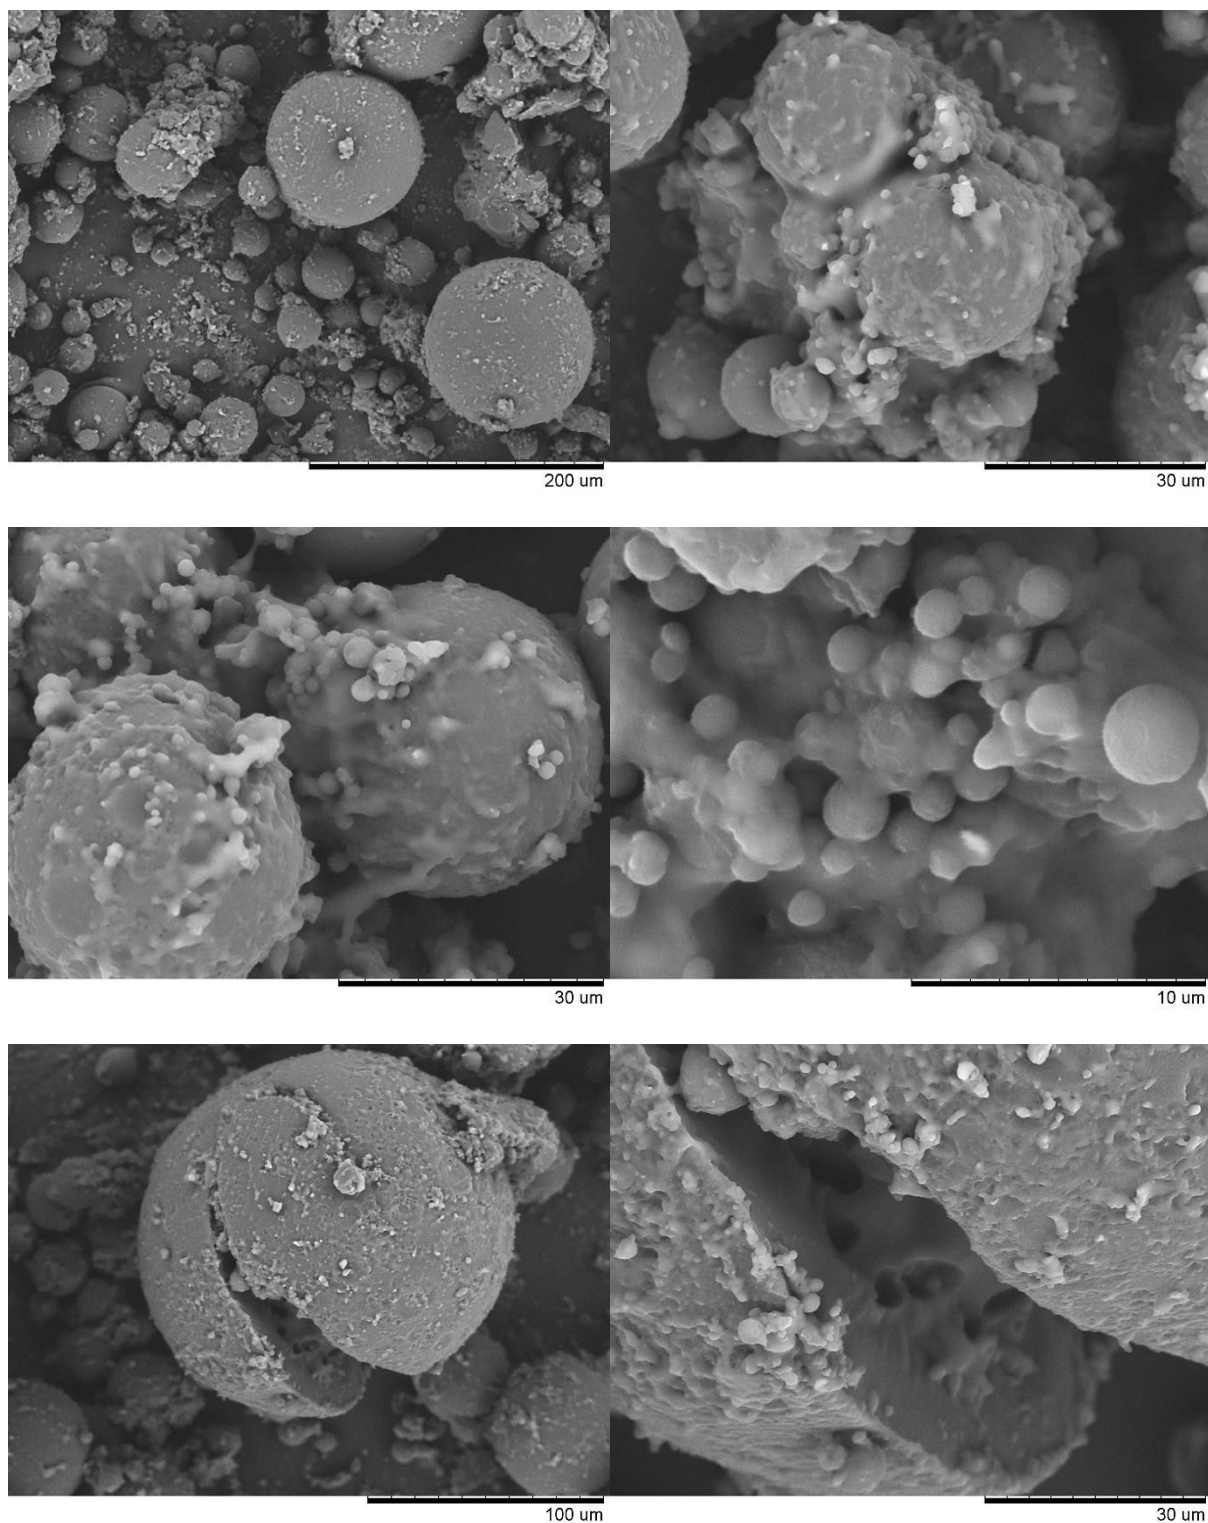

**Fig. S1** SEM images of polyurethane particles produced in the absence of catalyst (table 1, entry 2).

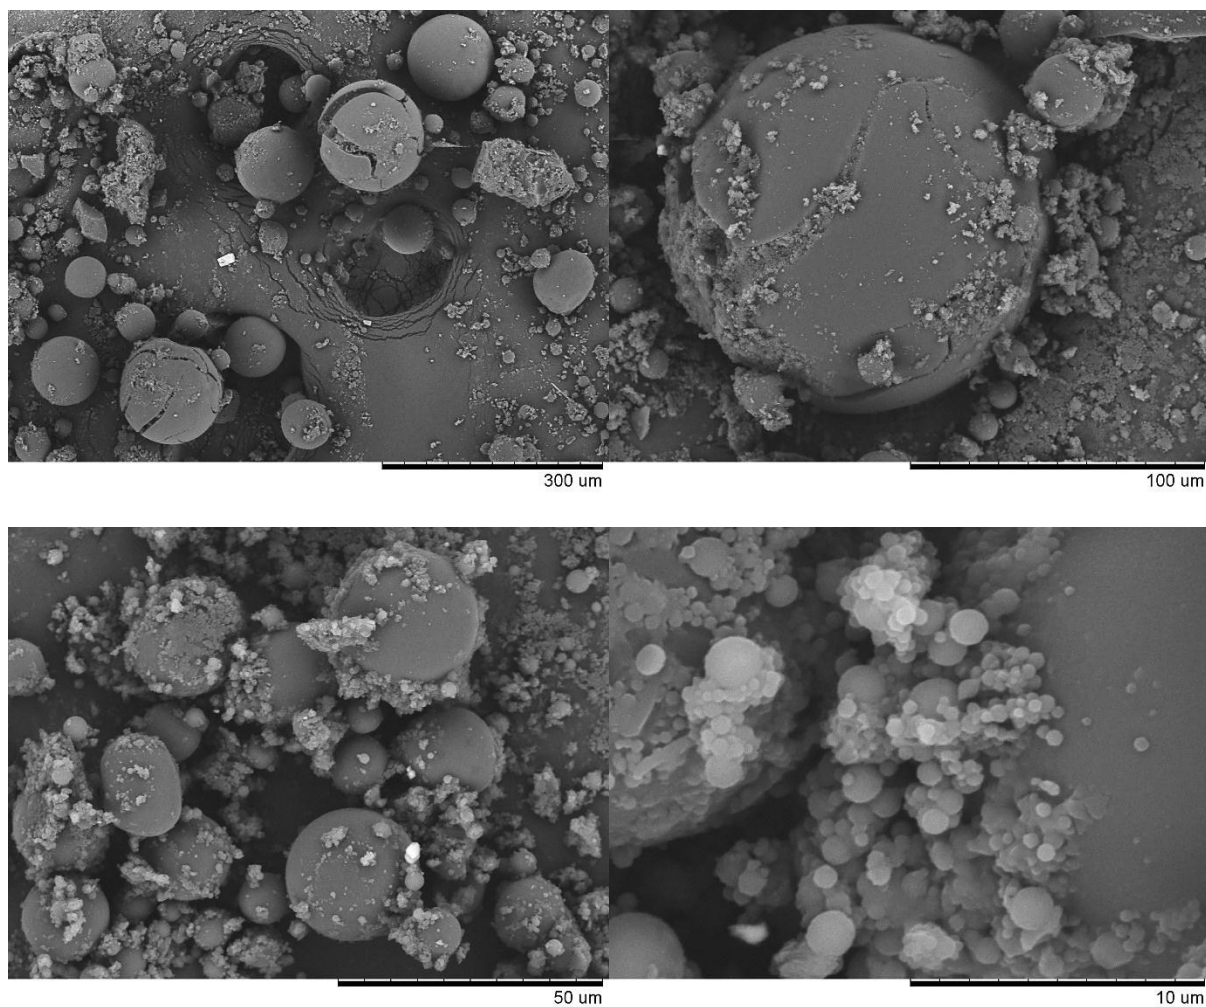

**Fig. S2** SEM images of polyurethane particles produced in the presence of 0.2 mol% NMO (table 1, entry 3).

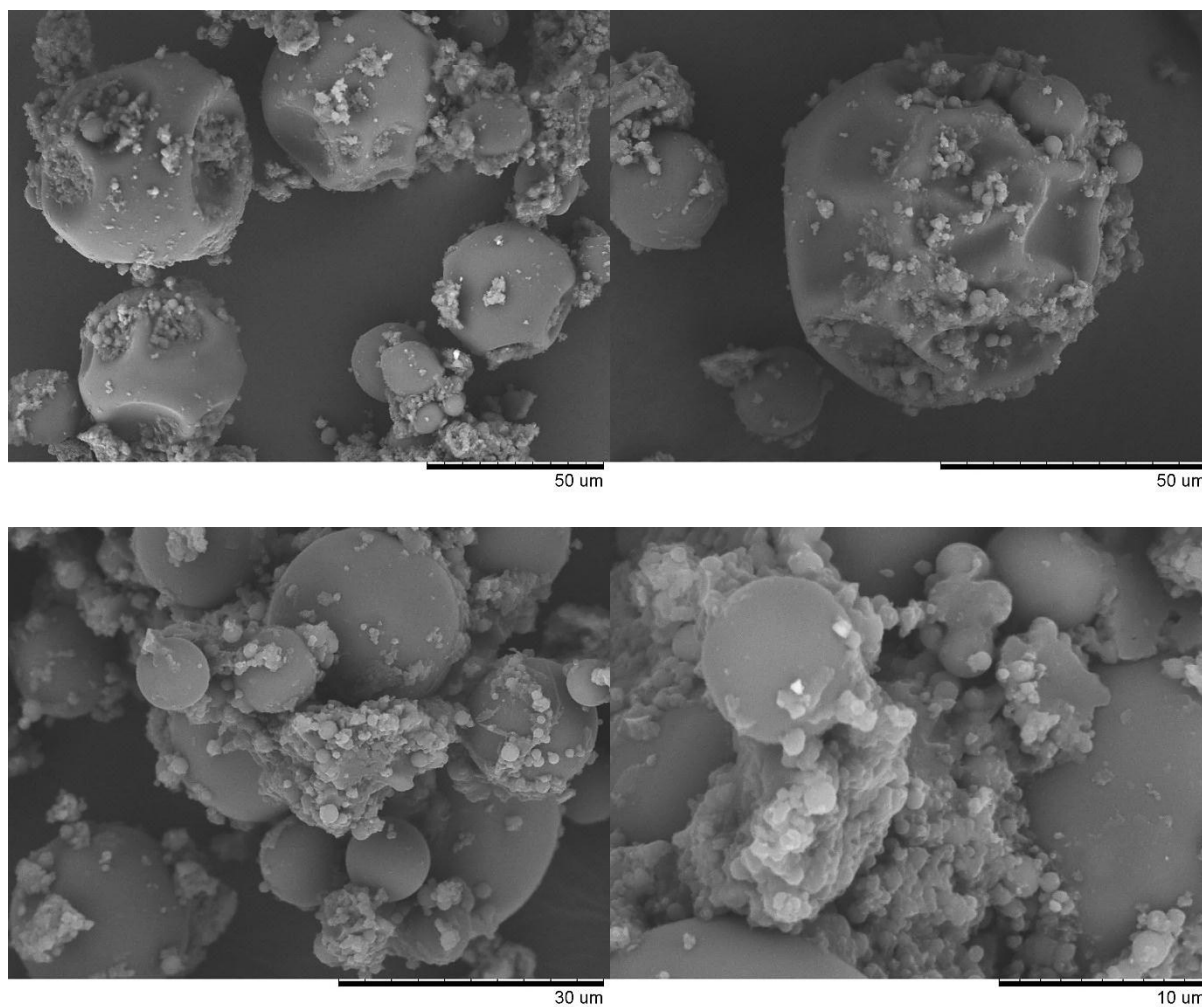

**Fig. S3** SEM images of polyurethane particles produced in the presence of 1 mol% NMO (table 1, entry 4).

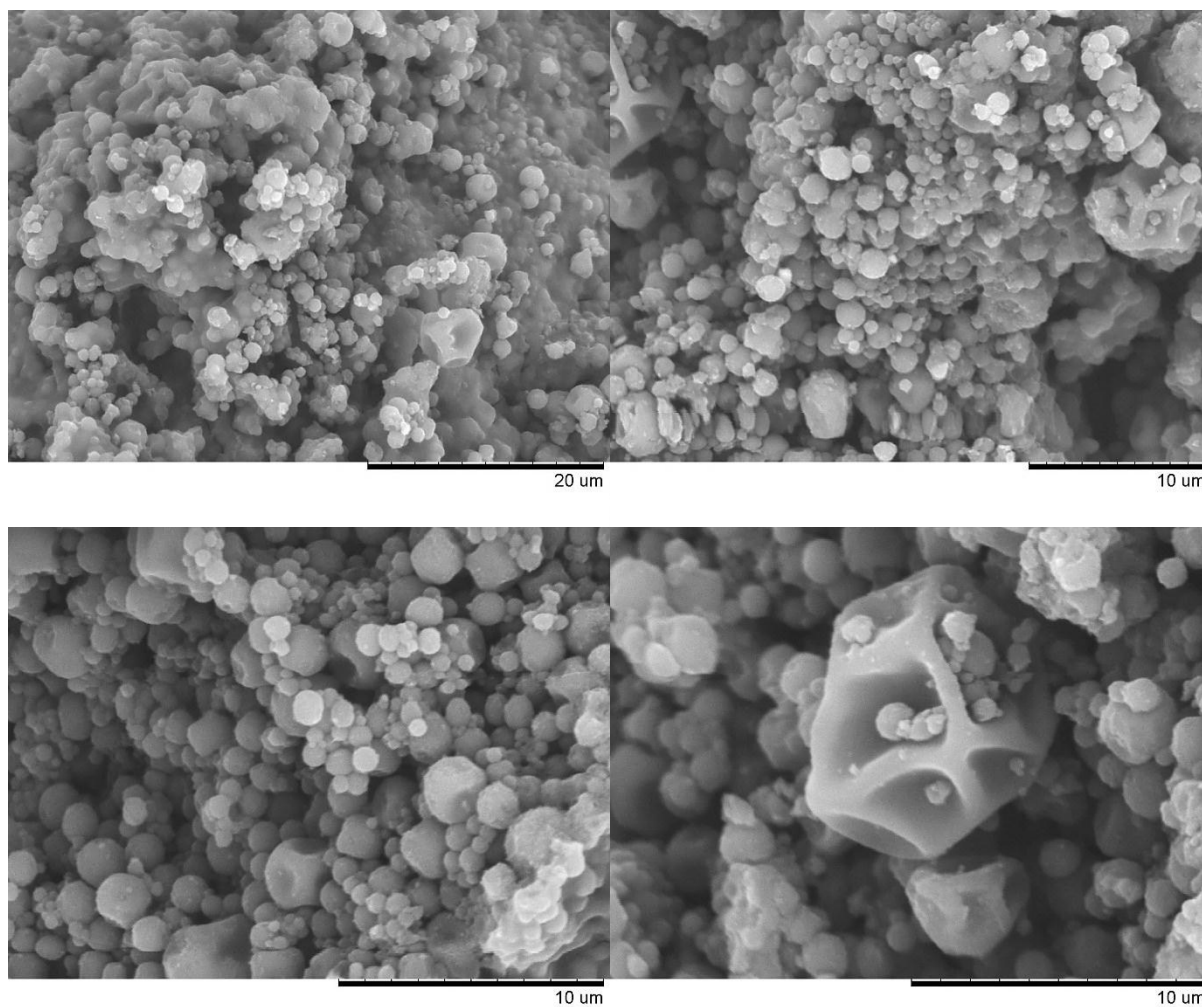

**Fig. S4** SEM images of polyurethane particles produced in the presence of 5 mol% NMO (table 1, entry 5).



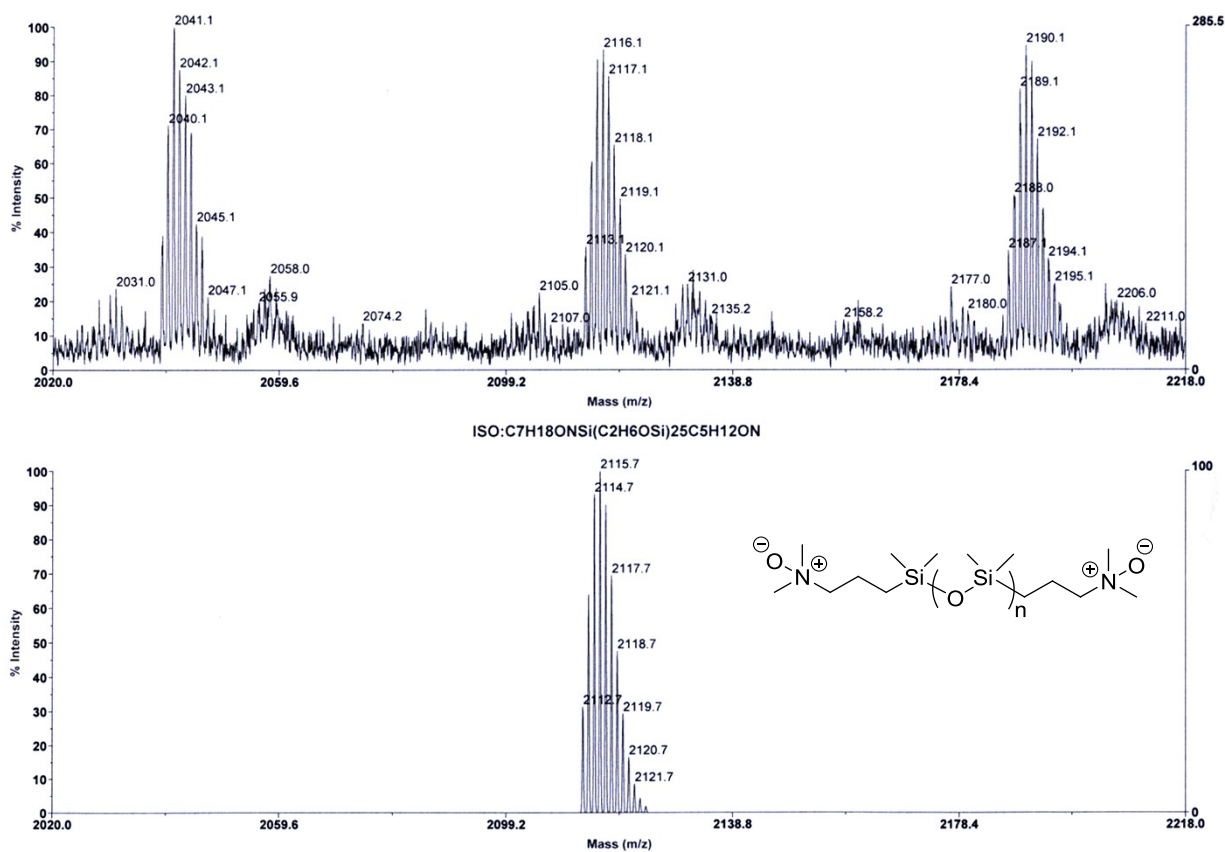

**Fig. S6** MALDI-TOF mass spectrum of the telechelic catasurf between 2020 and 2218 m/z (top) and calculated spectrum for  $n = 25$  (bottom).

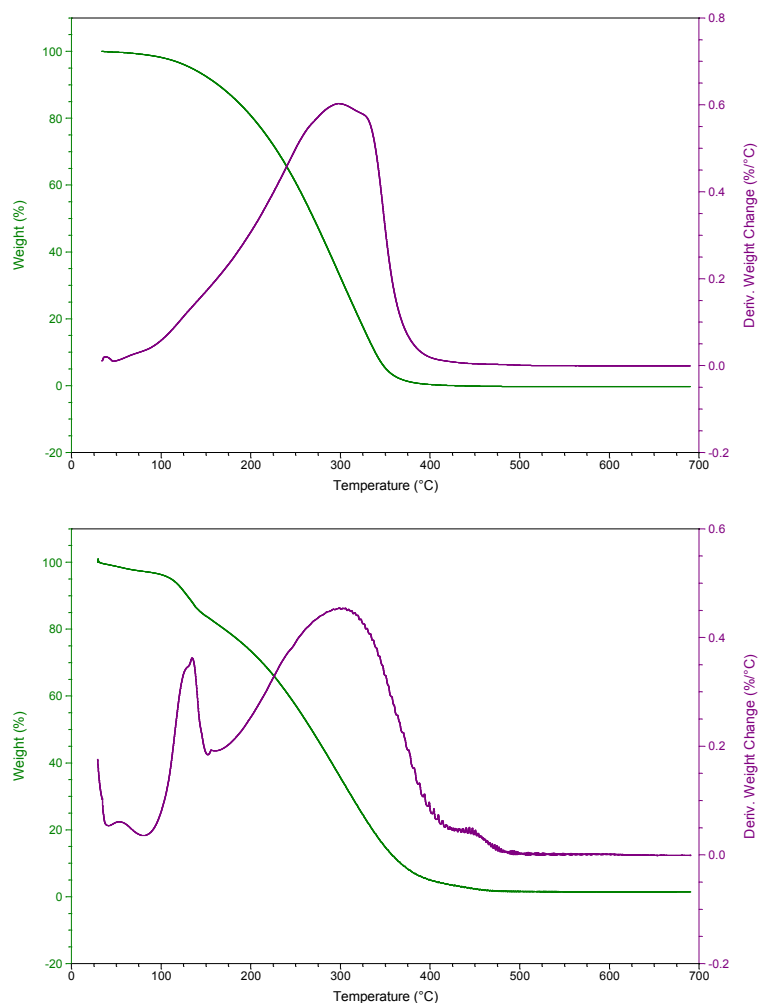

**Fig. S7** Thermogravimetric analysis curve (green) and differential thermogravimetric analysis curve (purple) of the mono-amino functionalised PDMS (top) and the mono-amine oxide functionalised PDMS (bottom) [ $M_n = 1600 \text{ g mol}^{-1}$ ].



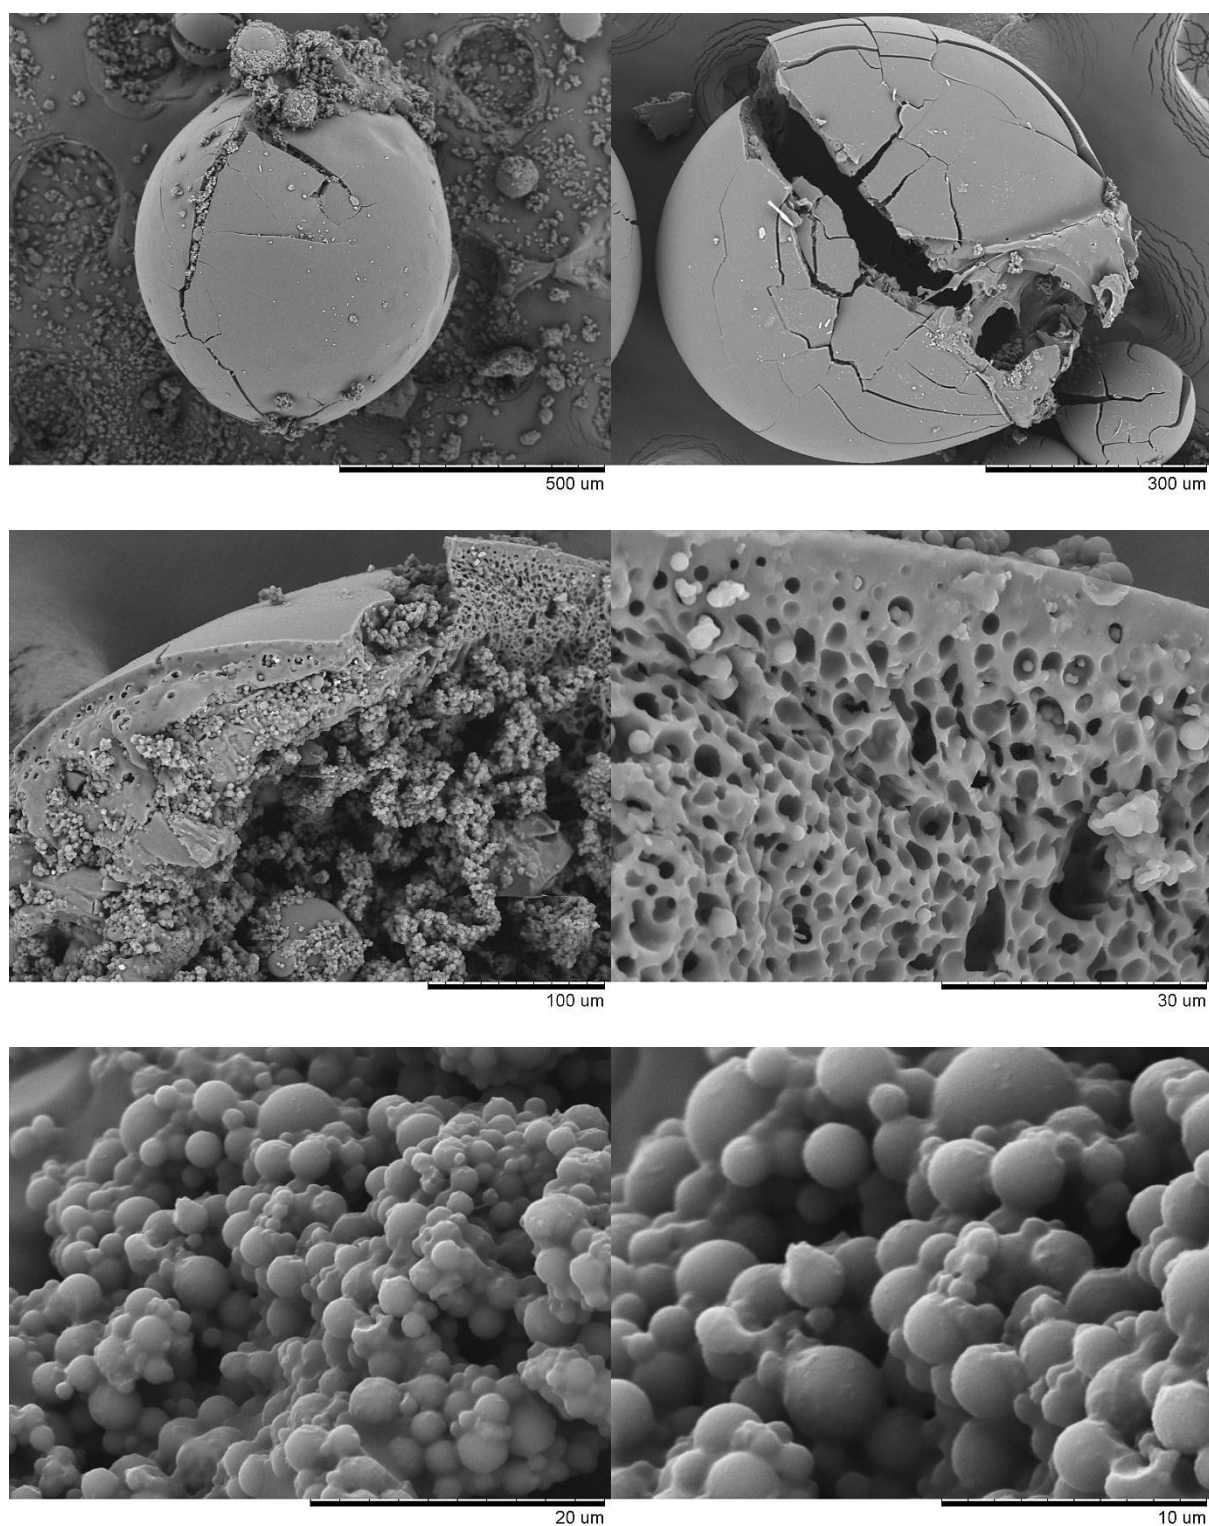

**Fig. S8** SEM images of polyurethane particles produced in the presence of 0.2 mol% of the telechelic catasurf with an  $M_n$  of  $15,000 \text{ g mol}^{-1}$  (table 2, entry 1a).

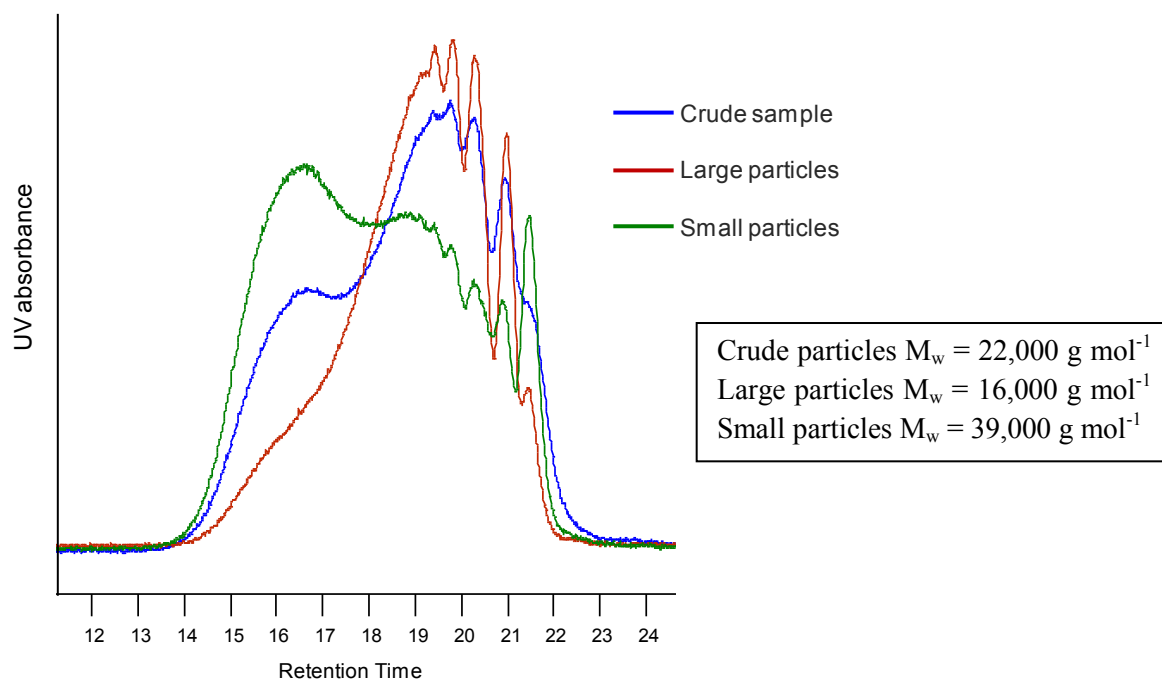

**Fig. S9** SEC traces of the polyurethane particles produced in the presence of 0.2 mol% of the telechelic catasurf with an  $M_n$  of  $15,000 \text{ g mol}^{-1}$  (table 2, entry 1a).

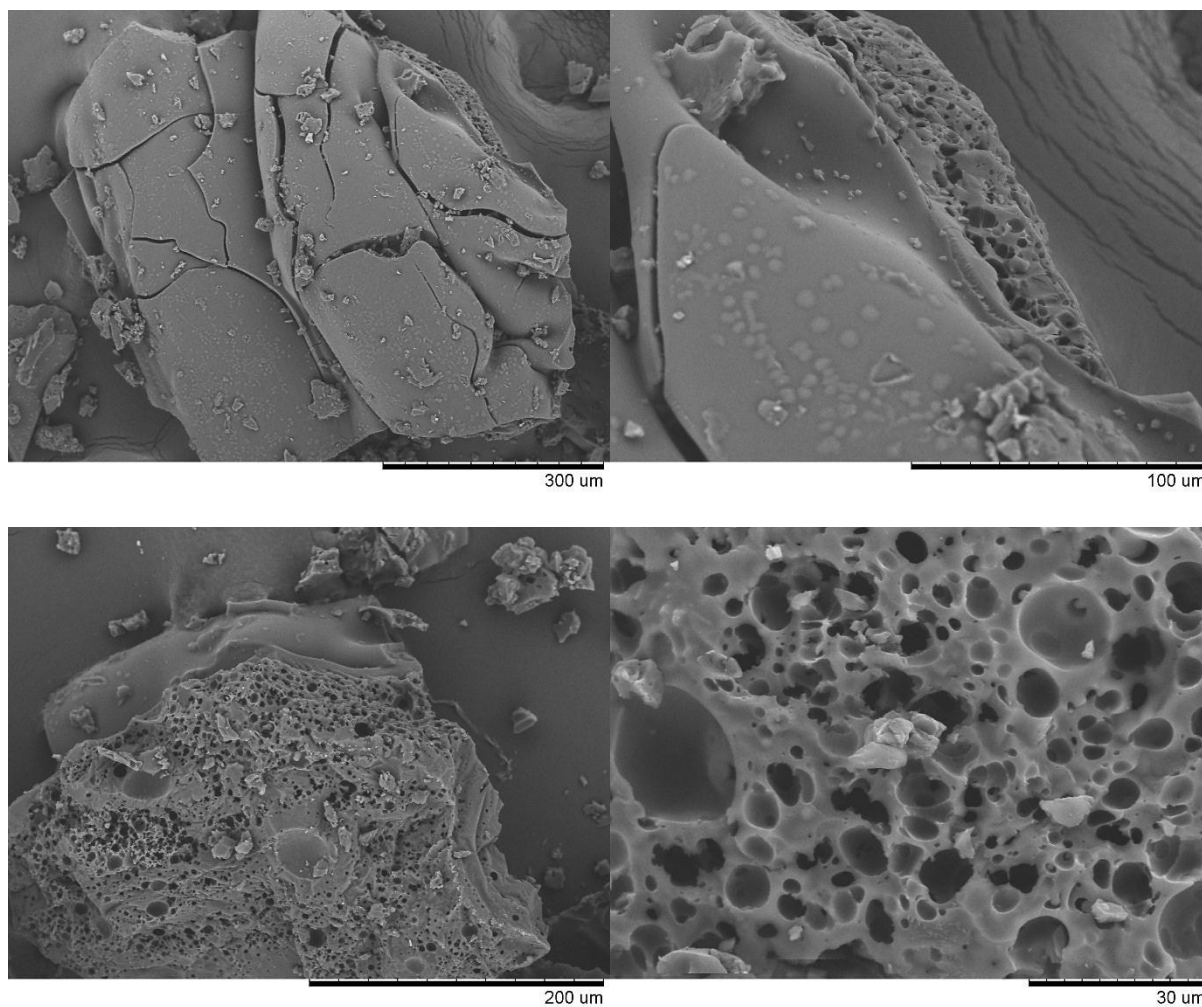

**Fig. S10** SEM images of polyurethane microcellular foam produced in the presence of the monofunctional catasurf with an  $M_n$  of  $1600 \text{ g mol}^{-1}$  (table 2, entry 4).

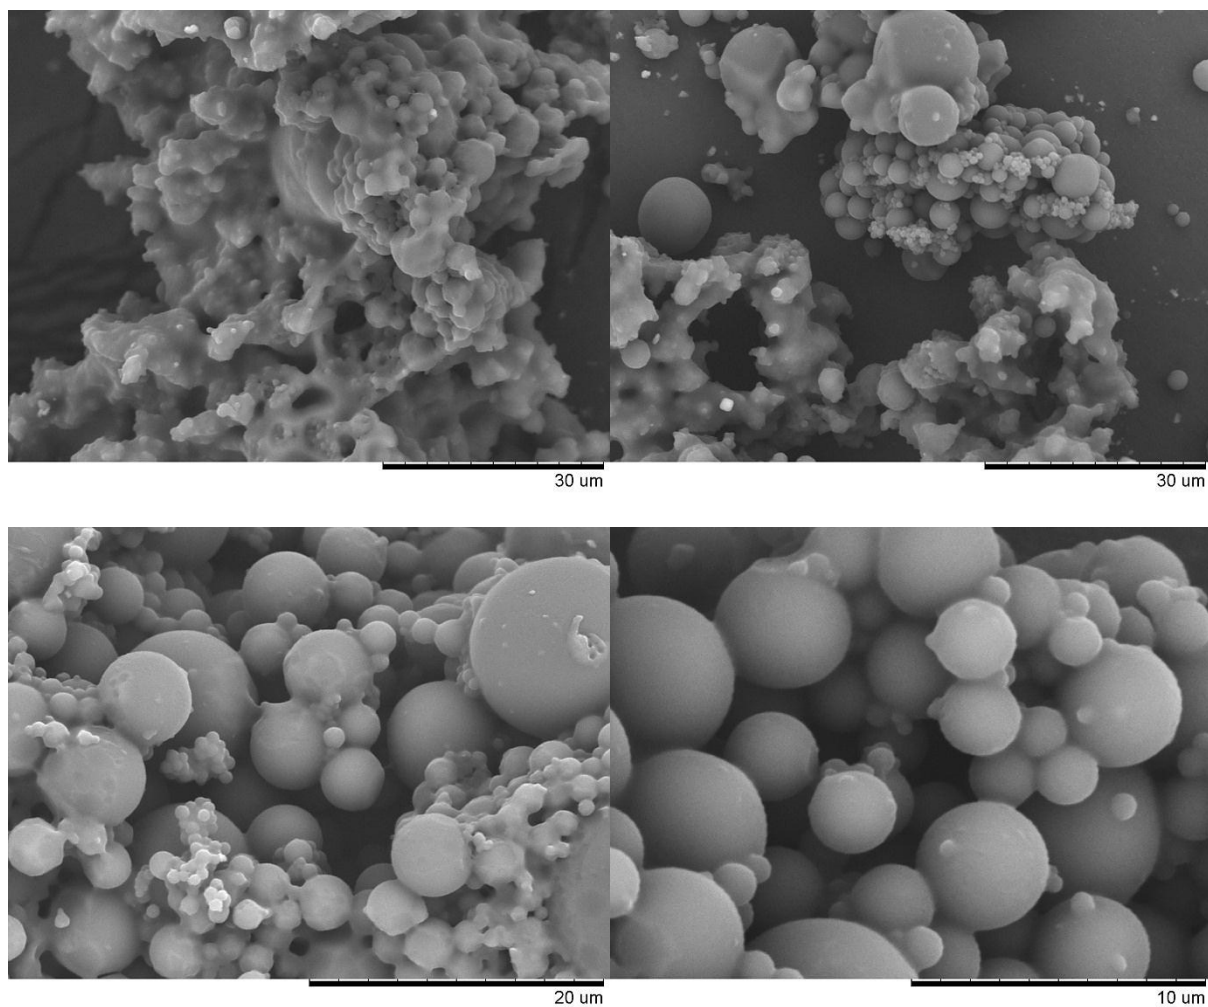

**Fig. S11** SEM images of polyurethane particles produced in the presence of 1.0 mol% of the telechelic catasurf with an  $M_n$  of  $12,000 \text{ g mol}^{-1}$  (table 2, entry 6).

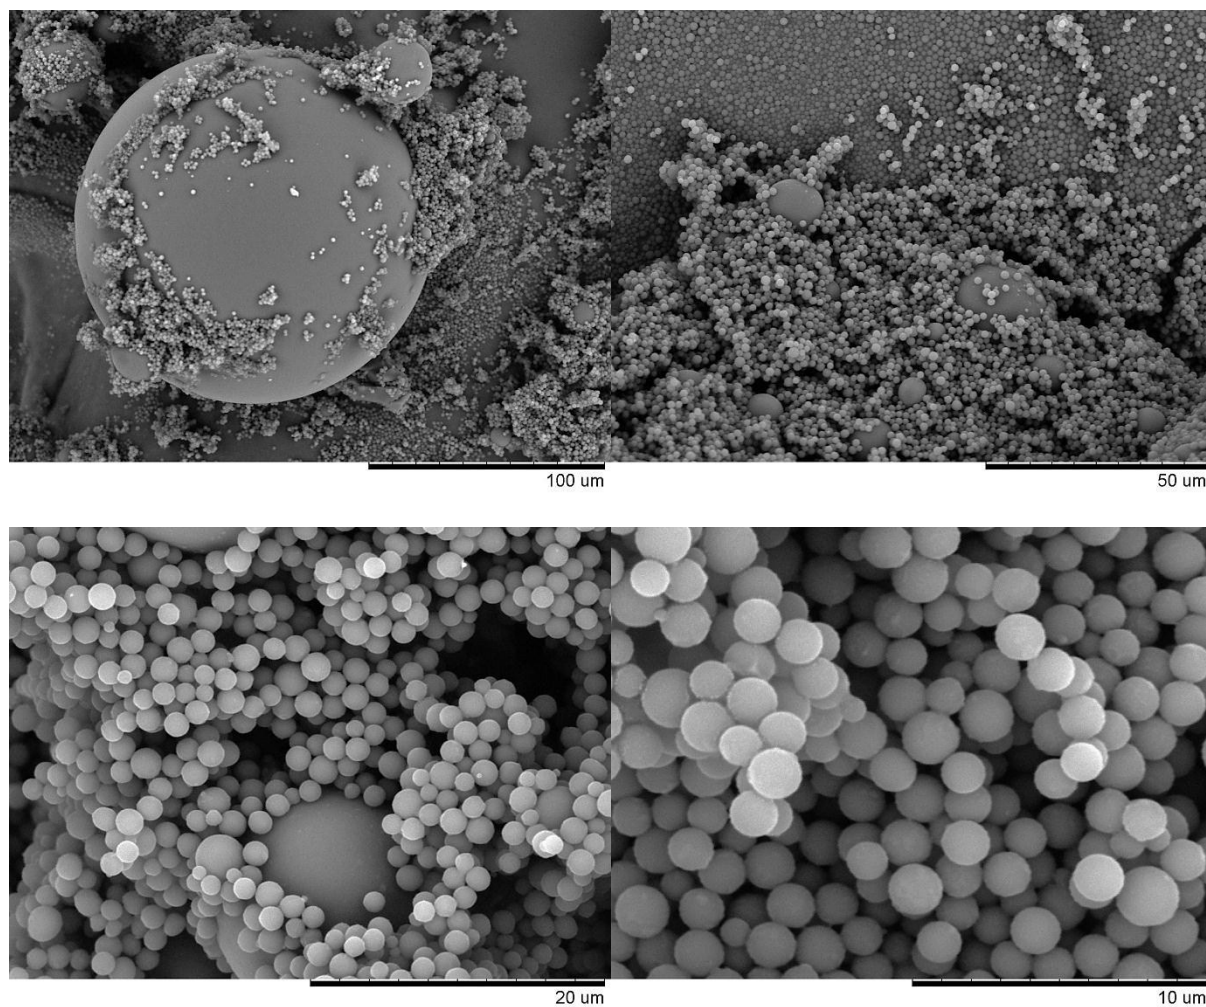

**Fig. S12** SEM images of polyurethane particles produced in the presence of 1.0 mol% of the monofunctional catasurf with an  $M_n$  of  $10,000 \text{ g mol}^{-1}$  (table 2, entry 7).

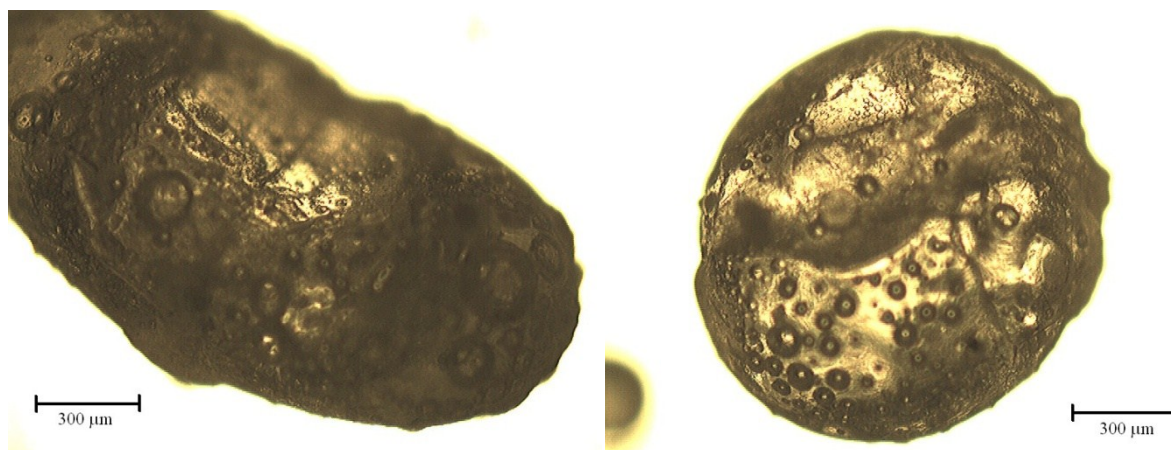

**Fig. S13** Optical microscope images of the large spheroidal beads produced with 1.0 mol% of the telechelic amino-terminated PDMS (table 2, entry 8).

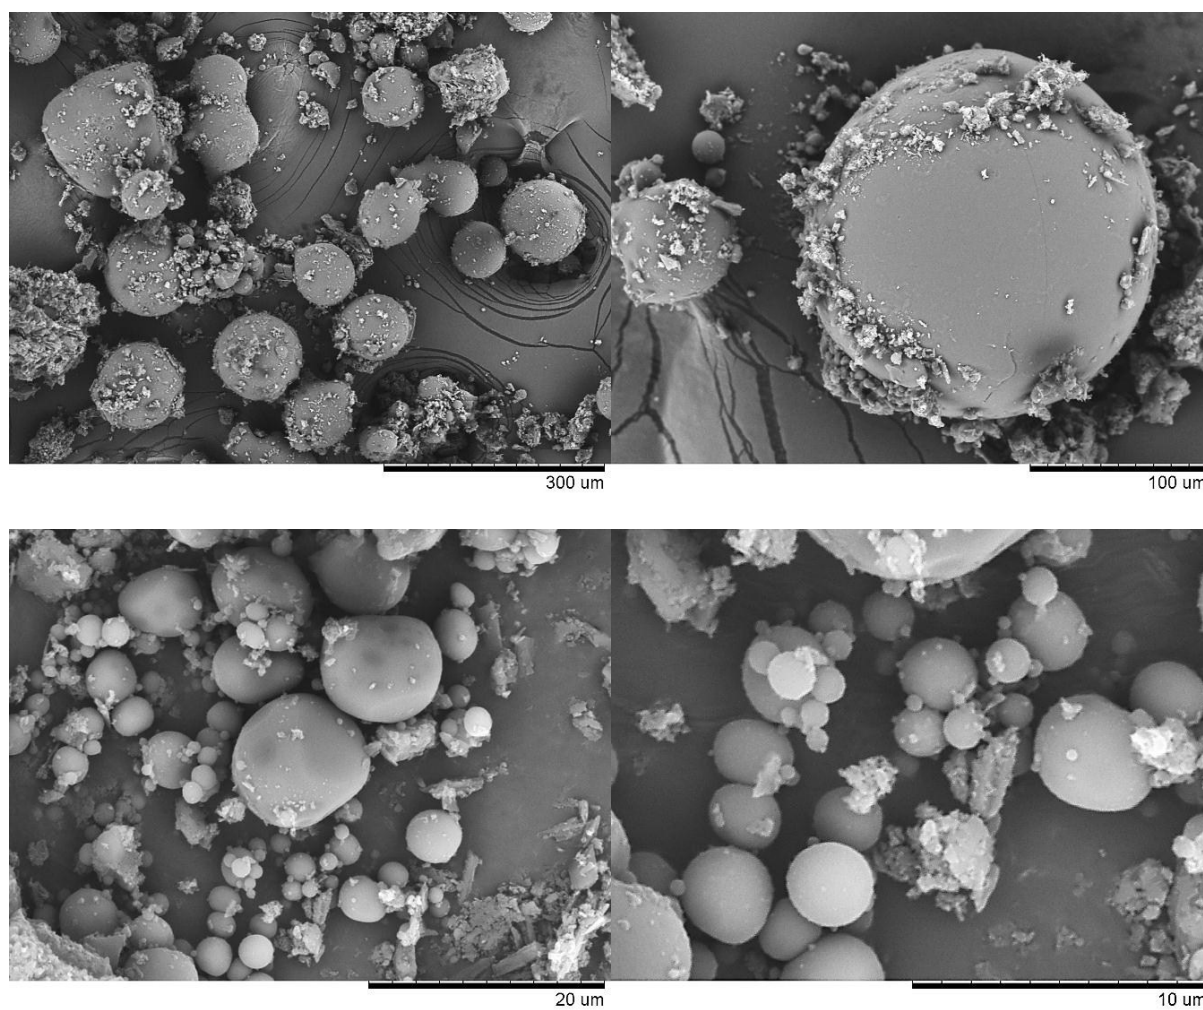

**Fig. S14** SEM images of polyurethane particles produced in the presence of 1.0 mol% of the telechelic amino-terminated PDMS (table 2, entry 8).
